# Supplementary material
Source: PubMed Central journal article supplement (PMC4407562)
Supplement: NIHMS676604-supplement-Supplemental.pdf [file NIHMS676604-supplement-Supplemental.pdf]

**eTable 1** Early Childhood Longitudinal Study-Birth Cohort survey questions on child health and disabilities.

| <b>Condition</b>                     | <b>Survey Question</b>                                                                                                                              |
|--------------------------------------|-----------------------------------------------------------------------------------------------------------------------------------------------------|
| ADHD                                 | Wave 3: Since (child's name) turned 2 years old, has a doctor ever told you that (child's name) has ADHD?                                           |
|                                      | Wave 4: Since (child's name) turned 4 years old, has a doctor ever told you that (child's name) has ADHD?                                           |
|                                      | Wave 5: Since (child's name) turned 5 years old, has a doctor ever told you that (child's name) has ADHD?                                           |
| Autism                               | Wave 3: Since (child's name) turned 2 years old, has a doctor ever told you that (child's name) has autism or PDD?                                  |
|                                      | Wave 4: Since (child's name) turned 4 years old, has a doctor ever told you that (child's name) has autism or PDD?                                  |
|                                      | Wave 5: Since (child's name) turned 5 years old, has a doctor ever told you that (child's name) has autism or PDD?                                  |
| Oppositional defiant disorder        | Wave 3: Since (child's name) turned 2 years old, has a doctor ever told you that (child's name) has oppositional defiant disorder?                  |
|                                      | Wave 4: Since (child's name) turned 4 years old, has a doctor ever told you that (child's name) has oppositional defiant disorder?                  |
|                                      | Wave 5: Since (child's name) turned 5 years old, has a doctor ever told you that (child's name) has oppositional defiant disorder?                  |
| Intellectual disability <sup>a</sup> | Wave 2: Has a doctor ever told you that (child's name) has mental retardation?                                                                      |
|                                      | Wave 3: Since (child's name) turned 2 years old, has a doctor ever told you that (child's name) has mental retardation?                             |
|                                      | Wave 4: Since (child's name) turned 4 years old, has a doctor ever told you that (child's name) has mental retardation?                             |
|                                      | Wave 5: Since (child's name) turned 5 years old, has a doctor ever told you that (child's name) has mental retardation?                             |
| Stuttering                           | Wave 4: Has (child's name) ever had a problem with stuttering?                                                                                      |
|                                      | Wave 5: Has (child's name) ever had a problem with stuttering?                                                                                      |
| Other developmental delay            | Wave 2: Has a doctor ever told you that (child's name) has other developmental delay?                                                               |
|                                      | Wave 3: Since (child's name) turned 2 years old, has a doctor ever told you that (child's name) other developmental delay?                          |
|                                      | Wave 4: Since (child's name) turned 4 years old, has a doctor ever told you that (child's name) has other developmental delay?                      |
|                                      | Wave 5: Since (child's name) turned 5 years old, has a doctor ever told you that (child's name) has other developmental delay?                      |
| Mobility disability                  | Wave 2: Has a doctor ever told you that (child's name) has a problem with mobility such as cerebral palsy?                                          |
|                                      | Wave 3: Since (child's name) turned 2 years old, has a doctor ever told you that (child's name) has a problem with mobility such as cerebral palsy? |
|                                      | Wave 4: Since (child's name) turned 4 years old, has a doctor ever told you that (child's name) has a problem with mobility such as cerebral palsy? |
|                                      | Wave 5: Since (child's name) turned 5 years old, has a doctor ever told you that (child's name) has a problem with mobility such as cerebral palsy? |
|                                      | Wave 5: Since (child's name) turned 5 years old, has a doctor ever told you that (child's name) has a problem with mobility such as cerebral palsy? |

| <b>Condition</b>                                                                                      | <b>Survey Question</b>                                                                                                                                                                                                                                                                                                                                                                                                                                                                                                                                                                                                                                                                                                                                                                                                                 |
|-------------------------------------------------------------------------------------------------------|----------------------------------------------------------------------------------------------------------------------------------------------------------------------------------------------------------------------------------------------------------------------------------------------------------------------------------------------------------------------------------------------------------------------------------------------------------------------------------------------------------------------------------------------------------------------------------------------------------------------------------------------------------------------------------------------------------------------------------------------------------------------------------------------------------------------------------------|
| Hearing loss                                                                                          | Wave 3: Since (child's name) turned 2 years old, have you had (child's name)'s hearing evaluated by a professional? If yes- Did you obtain a diagnosis of a problem from a professional? If yes- Is (child's name)'s hearing loss in the right ear, the left ear, or both?<br>Wave 4: Since (child's name) turned 4 years old, have you had (child's name)'s hearing evaluated by a professional? If yes- Did you obtain a diagnosis of a problem from a professional? If yes- Is (child's name)'s hearing loss in the right ear, the left ear, or both?<br>Wave 5: Since (child's name) turned 5 years old, have you had (child's name)'s hearing evaluated by a professional? If yes- Did you obtain a diagnosis of a problem from a professional? If yes- Is (child's name)'s hearing loss in the right ear, the left ear, or both? |
| Blindness                                                                                             | Wave 2: Has a doctor ever told you that (child's name) has blindness?                                                                                                                                                                                                                                                                                                                                                                                                                                                                                                                                                                                                                                                                                                                                                                  |
| Epilepsy                                                                                              | Wave 2: Has a doctor ever told you that (child's name) has epilepsy or seizures?<br>Wave 3: Since (child's name) turned 2 years old, has a doctor ever told you that (child's name) has epilepsy or seizures?<br>Wave 4: Since (child's name) turned 4 years old, has a doctor ever told you that (child's name) has epilepsy or seizures?<br>Wave 5: Since (child's name) turned 5 years old, has a doctor ever told you that (child's name) has epilepsy or seizures?                                                                                                                                                                                                                                                                                                                                                                |
| Abbreviations: ADHD, attention deficit hyperactivity disorder; PDD, pervasive developmental disorder. |                                                                                                                                                                                                                                                                                                                                                                                                                                                                                                                                                                                                                                                                                                                                                                                                                                        |

<sup>a</sup>The term intellectual disability is used instead of mental retardation throughout the paper to be consistent with current terminology.

**eTable 2** Comparison of sociodemographics between those in the analytic sample and those excluded due to attrition from wave 2 or missing data.

|                                         | Analytic Sample<br>n=5,200<br>% <sup>a</sup> | Excluded Sample<br>n=3,650 <sup>b</sup><br>% <sup>a</sup> | <i>P</i> |
|-----------------------------------------|----------------------------------------------|-----------------------------------------------------------|----------|
| <b>Maternal Characteristics</b>         |                                              |                                                           |          |
| Age, y                                  |                                              |                                                           | 0.01     |
| 15-19                                   | 10.4                                         | 12.4                                                      |          |
| 20-24                                   | 24.4                                         | 27.2                                                      |          |
| 25-29                                   | 27.6                                         | 24.6                                                      |          |
| 30-34                                   | 24.2                                         | 21.9                                                      |          |
| 35-50                                   | 13.4                                         | 13.9                                                      |          |
| Race-ethnicity                          |                                              |                                                           | <0.001   |
| White, non-Hispanic                     | 56.6                                         | 65.6                                                      |          |
| Black, non-Hispanic                     | 16.5                                         | 11.8                                                      |          |
| Hispanic                                | 21.9                                         | 19.4                                                      |          |
| Asian/Pacific Islander/ Native Hawaiian | 4.0                                          | 2.7                                                       |          |
| American Indian /Alaskan Native         | 1.0                                          | 0.4                                                       |          |
| Married                                 | 68.3                                         | 64.7                                                      | 0.01     |
| Schooling, y                            |                                              |                                                           | 0.002    |
| <12                                     | 19.9                                         | 24.0                                                      |          |
| 12                                      | 31.3                                         | 32.4                                                      |          |
| 13-15                                   | 22.2                                         | 20.9                                                      |          |
| ≥16                                     | 26.6                                         | 22.7                                                      |          |
| Primiparous                             | 41.9                                         | 38.9                                                      | 0.04     |
| Smoked during last 3 m of pregnancy     | 10.2                                         | 12.7                                                      | 0.005    |
| Prepregnancy BMI status                 |                                              |                                                           | 0.14     |
| Underweight                             | 5.1                                          | 6.5                                                       |          |
| Normal weight                           | 55.1                                         | 56.4                                                      |          |
| Overweight                              | 25.0                                         | 23.5                                                      |          |
| Obese class I                           | 8.7                                          | 8.2                                                       |          |
| Obese class II and III                  | 6.2                                          | 5.4                                                       |          |

<sup>a</sup> Presented as unweighted sample size rounded to the nearest 50 and weighted % per data agreement with the Department of Education. Percentages may not add to 100 due to rounding.

<sup>b</sup> Sample sizes for each variable may differ based on missing data for the excluded sample.
